# Supplementary material
Source: PubMed Central journal article supplement (PMC4108195)
Supplement: NIHMS587942-supplement-Supplemental_Data.pdf [file NIHMS587942-supplement-Supplemental_Data.pdf]

## Supplementary Figures

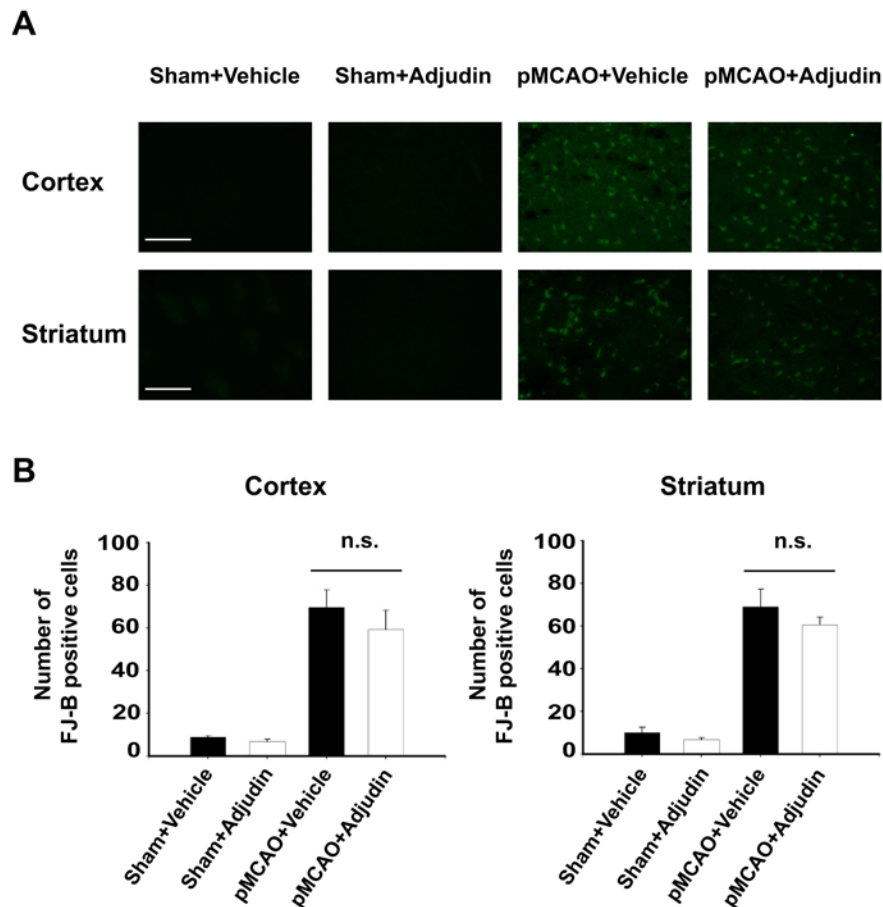

**Supplementary Figure.1.** Adjudin does not reduce the number of degenerating neurons after pMCAO. (A) Representative photographs of Fluoro-Jade B (*F-JB*) positive cells in cerebral cortex and striatum at 24 h after ischemia. Scale bar = 100  $\mu$ m. (B) The number of degenerating neurons is quantified (n=3-4 per group).

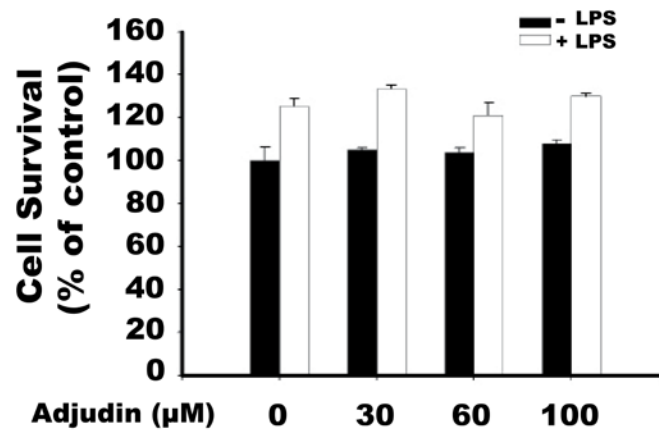

**Supplementary Figure.2.** Effect of Adjudin on the cell viability of primary mixed glial cultures. Cells were pretreated with indicated concentrations of Adjudin for 1 h and then stimulated with 200 ng/ml LPS for a 24-h incubation period. Cell viability was assessed by LDH assay. Bars represent the mean  $\pm$  SEM from three independent experiments.

## **Supplementary Materials and Methods**

### ***Primary mixed glial cultures***

Primary mixed glial cultures were isolated from cortex of post-natal day 1 Sprague Dawley rats. Briefly, cerebral cortex was dissected and then incubated in trypsin/EDTA at 37°C for 15 min. Tissue was dissociated by pipetting and centrifuged at 225 g for 5 min. The pellet was resuspended in DMEM and filtered through a nylon mesh. The resulting cell suspension was plated in 24-well plates with medium being changed every 2-3 days. Experiments were performed on these cells on days 12–16 of *in vitro* culture.

### ***Fluoro-Jade B (F-J B) staining***

Brain cryosections (20 µm) were fixed in 4% paraformaldehyde. The slides were immersed in a solution containing 1% sodium hydroxide in 80% alcohol for 5 min, followed by 2 min in 70% alcohol and 2 min in distilled water. Then the slides were transferred to a solution of 0.06% potassium permanganate for 10 min, rinsed in distilled water for 2 min and incubated in the 0.0004% staining solution for Fluoro-Jade® B (Millipore, Temecula, CA) for 20 min. Microscopic images were acquired using a laser-scanning confocal microscope (Leica TCS SP5 II, Germany).

## Supplementary Tables

### Detailed modified neurologic severity scores (mNSS):

|                                                                                | 24 h after pMCAO |   |   |   | 72 h after pMCAO |   |   |   |               |   |   |   |               |   |   |   |   |
|--------------------------------------------------------------------------------|------------------|---|---|---|------------------|---|---|---|---------------|---|---|---|---------------|---|---|---|---|
|                                                                                | Vehicle (n=4)    |   |   |   | Adjudin (n=4)    |   |   |   | Vehicle (n=5) |   |   |   | Adjudin (n=5) |   |   |   |   |
| <b>Raising the mouse by the tail</b>                                           |                  |   |   |   |                  |   |   |   |               |   |   |   |               |   |   |   |   |
| 1 Flexion of forelimb                                                          | 1                | 1 | 1 | 1 | 1                | 1 | 1 | 1 | 1             | 1 | 1 | 1 | 1             | 1 | 1 | 1 | 1 |
| 1 Flexion of hindlimb                                                          |                  |   |   |   |                  |   |   |   | 1             | 1 | 1 | 1 | 1             |   |   |   |   |
| 1 Head moved more than 10° to the vertical axis within 30s                     |                  |   |   |   |                  |   |   |   |               |   |   |   |               |   |   |   |   |
| <b>Walking on the floor</b>                                                    |                  |   |   |   |                  |   |   |   |               |   |   |   |               |   |   |   |   |
| 0 Normal walk                                                                  |                  |   |   |   |                  |   |   |   |               |   |   |   |               |   |   |   |   |
| 1 Inability to walk straight                                                   |                  |   |   |   |                  |   |   |   |               |   |   |   |               |   |   |   |   |
| 2 Circling toward the paretic side                                             | 2                | 2 | 2 | 2 | 2                | 2 | 2 | 2 | 2             |   | 2 | 2 | 2             | 2 | 2 | 2 | 2 |
| 3 Falling down to the paretic side                                             |                  |   |   |   |                  |   |   |   |               | 3 |   |   |               |   |   |   |   |
| <b>Beam balance tests</b>                                                      |                  |   |   |   |                  |   |   |   |               |   |   |   |               |   |   |   |   |
| 0 Balance with steady posture                                                  |                  |   |   |   |                  |   |   |   |               |   |   |   |               |   |   |   | 0 |
| 1 Grasps side of beam                                                          |                  |   |   |   |                  | 1 |   |   |               |   |   |   |               | 1 | 1 |   | 1 |
| 2 Hugs the beam and one limb falls down from the beam                          | 2                | 2 | 2 | 2 | 2                |   | 2 | 2 | 2             | 2 | 2 | 2 | 2             |   |   | 2 |   |
| 3 Hugs the beam and two limbs fall down from the beam, or spins on beam (>30s) |                  |   |   |   |                  |   |   |   |               |   |   |   |               |   |   |   |   |
| 4 Attempts to balance on the beam but falls off (>20s)                         |                  |   |   |   |                  |   |   |   |               |   |   |   |               |   |   |   |   |
| 5 Attempts to balance on the beam but falls off (>10s)                         |                  |   |   |   |                  |   |   |   |               |   |   |   |               |   |   |   |   |
| 6 Falls off. No attempt to balance or hang on to the beam (<10s)               |                  |   |   |   |                  |   |   |   |               |   |   |   |               |   |   |   |   |
| <b>Reflexes absence</b>                                                        |                  |   |   |   |                  |   |   |   |               |   |   |   |               |   |   |   |   |
| 1 Pinna reflex (a head shake when touching the auditory meatus)                |                  |   |   |   |                  |   |   |   |               |   |   |   |               |   |   |   |   |
| 1 Corneal reflex (an eye blink when touching the cornea with cotton)           |                  |   |   |   |                  |   |   |   |               |   |   |   |               |   |   |   |   |
| <b>Total Score</b>                                                             | 5                | 5 | 5 | 5 | 5                | 4 | 5 | 5 | 6             | 7 | 6 | 6 | 6             | 4 | 4 | 5 | 4 |
| <b>Average of total score</b>                                                  | 5                |   |   |   | 4.75             |   |   |   | 6.2           |   |   |   | 4             |   |   |   |   |
